# Supplementary material for: Evaluating tools for transcription factor binding site prediction
Source: Springer Nature journal article supplement (doi:10.1186/s12859-016-1298-9), 2016-11-02

# Evaluating tools for transcription factor binding site prediction

## Sequence Logos

N. Jayaram, D. Usvyat and A.C.R. Martin

### Ctcf

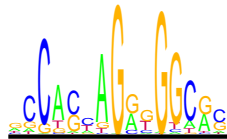

Chipmunk

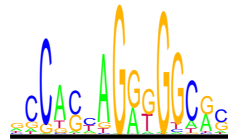

Homer

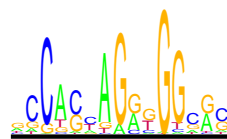

MEME-Chip

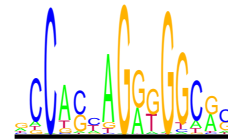

rGADEM

### E2F1

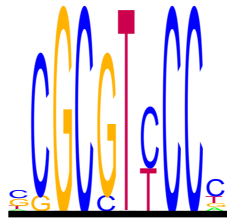

Chipmunk

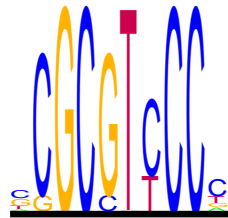

Homer

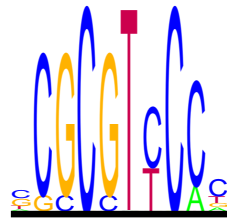

MEME-Chip

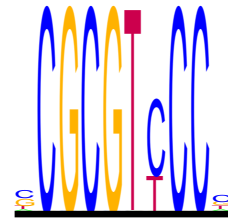

rGADEM

### ELK4

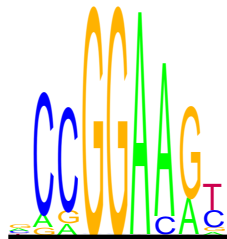

Chipmunk

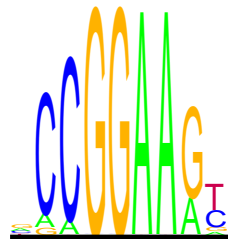

Homer

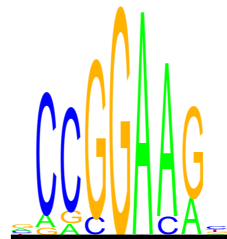

MEME-Chip

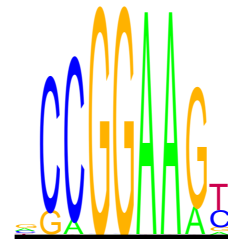

rGADEM



## NFKB

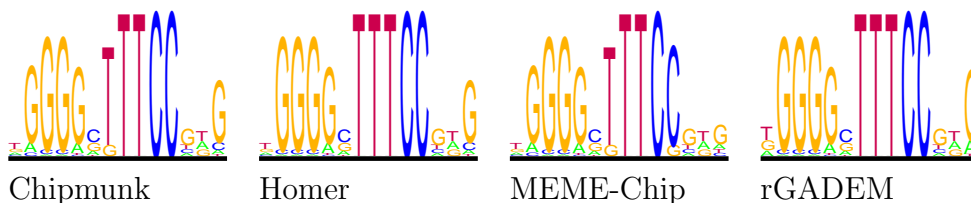

## NF-YA

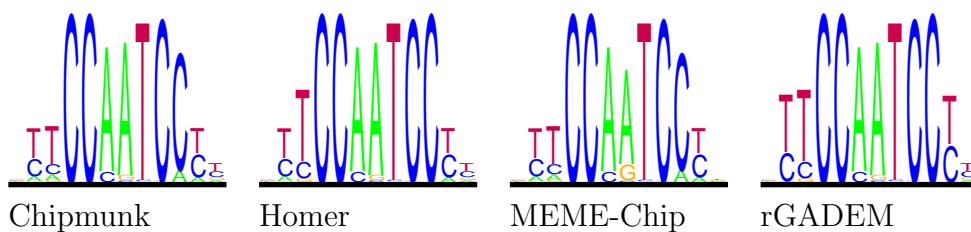

## STAT1

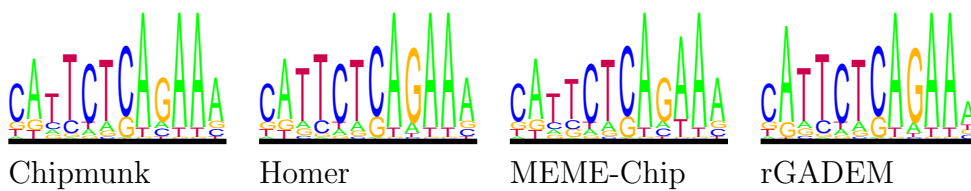

## TAL1

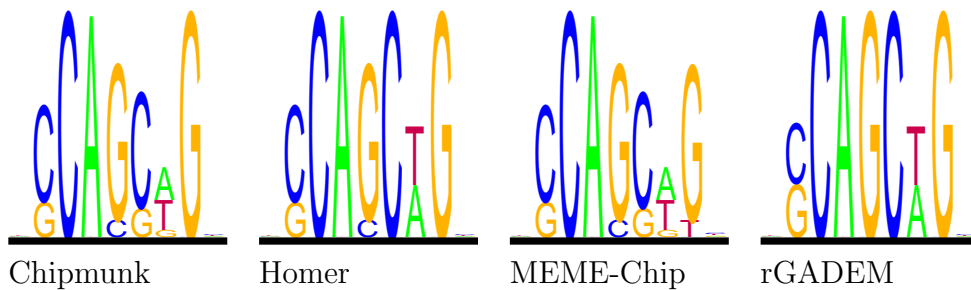

## YY1

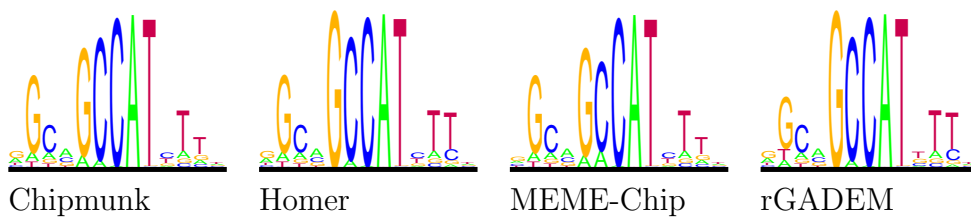

Supplement: 12859_2016_1298_MOESM4_ESM.pdf [file 12859_2016_1298_MOESM4_ESM.pdf]
